# Supplementary material
Source: HighWire-hosted journal article supplement (https://www.cfp.ca/highwire/filestream/34512/field_highwire_adjunct_files/4/e194_Appendix_5_JADAD_Scores.pdf)
Supplement: e194_Appendix_5_JADAD_Scores.pdf [file e194_Appendix_5_JADAD_Scores.pdf]

## Appendix 5. JADAD Scores for Included RCTs

| Randomized Controlled Trial             | Was it randomized? | Was randomization process appropriate? | Was it double-blind? | Was blinding process appropriate? | Were drop-outs described? | Deductions (for inappropriate randomization or blinding) | JADAD (0-5) |
|-----------------------------------------|--------------------|----------------------------------------|----------------------|-----------------------------------|---------------------------|----------------------------------------------------------|-------------|
| Primary Care                            |                    |                                        |                      |                                   |                           |                                                          |             |
| Carrieri 2014                           | 1                  | 0                                      | 0                    | 0                                 | 1                         | 0                                                        | 2           |
| Fiellin 2001                            | 1                  | 1                                      | 0                    | 0                                 | 1                         | 0                                                        | 3           |
| Gibson 2003**                           | 1                  | 1                                      | 0                    | 0                                 | 0                         | 0                                                        | 2           |
| O'Connor 1998                           | 1                  | 0                                      | 0                    | 0                                 | 1                         | 0                                                        | 2           |
| Diagnosis                               |                    |                                        |                      |                                   |                           |                                                          |             |
| None                                    |                    |                                        |                      |                                   |                           |                                                          |             |
| Pharmacotherapy: Buprenorphine-Naloxone |                    |                                        |                      |                                   |                           |                                                          |             |
| Dunlop 2017*                            | 1                  | 1                                      | 0                    | 0                                 | 1                         | 0                                                        | 3           |
| Potter 2013*                            | 1                  | 0                                      | 0                    | 0                                 | 1                         | 0                                                        | 2           |
| Neumann 2013*                           | 1                  | 1                                      | 0                    | 0                                 | 1                         | -1                                                       | 2           |
| Otiashvili 2013*                        | 1                  | 1                                      | 0                    | 0                                 | 1                         | 0                                                        | 3           |
| Rosenthal 2013**                        | 1                  | 1                                      | 1                    | 0                                 | 1                         | -1                                                       | 3           |
| Sigmon 2016*                            | 1                  | 0                                      | 0                    | 0                                 | 0                         | 0                                                        | 1           |
| Pharmacotherapy: Methadone              |                    |                                        |                      |                                   |                           |                                                          |             |
| Wilson 2010*                            | 1                  | 1                                      | 0                    | 0                                 | 1                         | 0                                                        | 3           |
| Pharmacotherapy: Naltrexone             |                    |                                        |                      |                                   |                           |                                                          |             |
| Springer 2018*                          | 1                  | 1                                      | 1                    | 0                                 | 1                         | 0                                                        | 4           |
| Coviello 2010*                          | 1                  | 0                                      | 0                    | 0                                 | 0                         | 0                                                        | 1           |
| Krupitsky 2012*                         | 1                  | 1                                      | 1                    | 1                                 | 0                         | 0                                                        | 4           |
| Krupitsky 2013*                         | 1                  | 1                                      | 1                    | 1                                 | 0                         | 0                                                        | 4           |
| Mokri 2016*                             | 1                  | 1                                      | 1                    | 1                                 | 1                         | 0                                                        | 5           |
| Pharmacotherapy: Cannabinoids           |                    |                                        |                      |                                   |                           |                                                          |             |
| Bisaga 2015*                            | 1                  | 0                                      | 1                    | 1                                 | 1                         | 0                                                        | 4           |
| Witnessed Ingestion/Daily Dispensing    |                    |                                        |                      |                                   |                           |                                                          |             |
| Bell 2007                               | 1                  | 1                                      | 0                    | 0                                 | 0                         | 0                                                        | 2           |
| Fiellin 2006**                          | 1                  | 1                                      | 0                    | 0                                 | 1                         | 0                                                        | 3           |
| Holland 2012                            | 1                  | 1                                      | 0                    | 0                                 | 1                         | 0                                                        | 3           |
| Holland 2014                            | 1                  | 1                                      | 0                    | 0                                 | 1                         | 0                                                        | 3           |
| Rhoades 1998**                          | 1                  | 0                                      | 0                    | 0                                 | 0                         | 0                                                        | 1           |
| Contracts                               |                    |                                        |                      |                                   |                           |                                                          |             |
| None                                    |                    |                                        |                      |                                   |                           |                                                          |             |
| Urine Drug Testing                      |                    |                                        |                      |                                   |                           |                                                          |             |
| None                                    |                    |                                        |                      |                                   |                           |                                                          |             |
| Duration of Therapy                     |                    |                                        |                      |                                   |                           |                                                          |             |

|                                             |   |   |   |   |   |   |   |
|---------------------------------------------|---|---|---|---|---|---|---|
| <b>Blondell 2010</b>                        | 1 | 1 | 0 | 0 | 1 | 0 | 3 |
| <b>Fiellin 2014**</b>                       | 1 | 1 | 0 | 0 | 1 | 0 | 3 |
| <b>Sees 2000**</b>                          | 1 | 1 | 0 | 0 | 1 | 0 | 3 |
| <b>Ling 2009</b>                            | 1 | 1 | 0 | 0 | 0 | 0 | 2 |
| <b>Marsch 2014</b>                          | 1 | 1 | 1 | 1 | 0 | 0 | 4 |
| <b>Sigmon 2013</b>                          | 1 | 1 | 1 | 1 | 0 | 0 | 4 |
| <b>Psychosocial and Behavioural Therapy</b> |   |   |   |   |   |   |   |
| <b>Abbott 1998</b>                          | 1 | 1 | 0 | 0 | 0 | 0 | 2 |
| <b>Abrahms 1979</b>                         | 1 | 0 | 0 | 0 | 0 | 0 | 1 |
| <b>Bernstein 2005</b>                       | 1 | 1 | 1 | 1 | 1 | 0 | 5 |
| <b>Bickel 2008</b>                          | 1 | 1 | 0 | 0 | 0 | 0 | 2 |
| <b>Brooner 2004</b>                         | 1 | 0 | 0 | 0 | 0 | 0 | 1 |
| <b>Chawarski 2011</b>                       | 1 | 1 | 0 | 0 | 0 | 0 | 2 |
| <b>Chen 2013</b>                            | 1 | 0 | 0 | 0 | 0 | 0 | 1 |
| <b>Chopra 2009</b>                          | 1 | 1 | 0 | 0 | 0 | 0 | 2 |
| <b>Chutuape 2001</b>                        | 1 | 1 | 0 | 0 | 0 | 0 | 2 |
| <b>Chutuape 1999</b>                        | 1 | 1 | 0 | 0 | 1 | 0 | 3 |
| <b>De Fulio 2012</b>                        | 1 | 1 | 0 | 0 | 0 | 0 | 2 |
| <b>Dunn 2013</b>                            | 1 | 1 | 0 | 0 | 0 | 0 | 2 |
| <b>Epstein 2009</b>                         | 1 | 1 | 0 | 0 | 0 | 0 | 2 |
| <b>Everly 2011</b>                          | 1 | 1 | 0 | 0 | 0 | 0 | 2 |
| <b>Fiellin 2006</b>                         | 1 | 1 | 0 | 0 | 1 | 0 | 3 |
| <b>Fiellin 2013</b>                         | 1 | 1 | 0 | 0 | 1 | 0 | 3 |
| <b>Ghitza 2008</b>                          | 1 | 0 | 0 | 0 | 0 | 0 | 1 |
| <b>Gross 2006</b>                           | 1 | 0 | 0 | 0 | 1 | 0 | 2 |
| <b>Gu 2013</b>                              | 1 | 1 | 0 | 0 | 0 | 0 | 2 |
| <b>Hser 2011</b>                            | 1 | 1 | 0 | 0 | 0 | 0 | 2 |
| <b>Iguchi 1997</b>                          | 1 | 0 | 0 | 0 | 0 | 0 | 1 |
| <b>Jaffray 2014</b>                         | 1 | 0 | 0 | 0 | 1 | 0 | 2 |
| <b>Jiang 2012</b>                           | 1 | 1 | 0 | 0 | 0 | 0 | 2 |
| <b>Katz 2002</b>                            | 1 | 0 | 0 | 0 | 0 | 0 | 1 |
| <b>Kidorf 1996</b>                          | 1 | 0 | 0 | 0 | 1 | 0 | 2 |
| <b>Kidorf 2013</b>                          | 1 | 1 | 0 | 0 | 0 | 0 | 2 |
| <b>Kosten 2003</b>                          | 1 | 0 | 0 | 0 | 1 | 0 | 2 |
| <b>Ling 2013</b>                            | 1 | 1 | 0 | 0 | 1 | 0 | 3 |
| <b>Liu 2018*</b>                            | 1 | 1 | 0 | 0 | 1 | 0 | 3 |
| <b>Marsch 2014</b>                          | 1 | 0 | 0 | 0 | 0 | 0 | 1 |
| <b>Milby 1978</b>                           | 1 | 1 | 0 | 0 | 0 | 0 | 2 |
| <b>Neufeld 2008</b>                         | 1 | 0 | 0 | 0 | 0 | 0 | 1 |
| <b>Oliveto 2005</b>                         | 1 | 0 | 0 | 0 | 1 | 0 | 2 |
| <b>Pan 2015*</b>                            | 1 | 1 | 0 | 0 | 1 | 0 | 3 |
| <b>Peirce 2006</b>                          | 1 | 1 | 0 | 0 | 0 | 0 | 2 |
| <b>Petry 2002</b>                           | 1 | 1 | 0 | 0 | 0 | 0 | 2 |
| <b>Petry 2005</b>                           | 1 | 1 | 0 | 0 | 1 | 0 | 3 |
| <b>Petry 2007</b>                           | 1 | 1 | 0 | 0 | 0 | 0 | 2 |

|                             |   |   |   |   |   |    |   |
|-----------------------------|---|---|---|---|---|----|---|
| <b>Preston 2000</b>         | 1 | 1 | 0 | 0 | 1 | 0  | 3 |
| <b>Saunders 1995</b>        | 1 | 0 | 0 | 0 | 0 | -1 | 0 |
| <b>Scherbaum 2005</b>       | 1 | 1 | 0 | 0 | 1 | 0  | 3 |
| <b>Schottenfeld 2005</b>    | 1 | 1 | 0 | 0 | 1 | 0  | 3 |
| <b>Silverman 2004</b>       | 1 | 1 | 0 | 0 | 1 | 0  | 3 |
| <b>Stein 2009</b>           | 1 | 0 | 0 | 0 | 0 | 0  | 1 |
| <b>Stitzer 1992</b>         | 1 | 0 | 0 | 0 | 0 | 0  | 1 |
| <b>Tetrault 2012</b>        | 1 | 0 | 0 | 0 | 1 | 0  | 2 |
| <b>Wang 2014</b>            | 0 | 0 | 0 | 0 | 0 | 0  | 0 |
| <b>Weiss 2011</b>           | 1 | 1 | 0 | 0 | 1 | 0  | 3 |
| Comorbidities: Acute Pain   |   |   |   |   |   |    |   |
| <b>Solhi 2016*</b>          | 1 | 0 | 0 | 0 | 0 | 0  | 1 |
| Comorbidities: Chronic Pain |   |   |   |   |   |    |   |
| <b>Blondell 2010*</b>       | 1 | 1 | 0 | 0 | 1 | 0  | 3 |
| <b>Neumann 2013*</b>        | 1 | 1 | 0 | 0 | 1 | 0  | 3 |
| <b>Wiest 2015*</b>          | 1 | 1 | 0 | 0 | 0 | 0  | 2 |
| Comorbidities: ADHD         |   |   |   |   |   |    |   |
| <b>Levin 2006*</b>          | 1 | 0 | 0 | 0 | 1 | 0  | 4 |
| Comorbidities: Anxiety      |   |   |   |   |   |    |   |
| <b>McRae 2004</b>           | 1 | 1 | 1 | 1 | 1 | 0  | 5 |
| Comorbidities: Insomnia     |   |   |   |   |   |    |   |
| <b>Stein 2012*</b>          | 1 | 1 | 1 | 1 | 0 | 0  | 4 |

\* Study identified from RCT search.

\*\* Study identified through grey literature search.
